# Supplementary material for: Homeostatic signals, including IL-7 and self-MHC recognition, induce the development of peripheral helper T cells, which are enriched in the joints of rheumatoid arthritis
Source: PubMed Central journal article supplement (PMC11567946; doi:10.1016/j.jtauto.2024.100258), 2024-10-30
Supplement: mmc1.pdf [file mmc1.pdf]

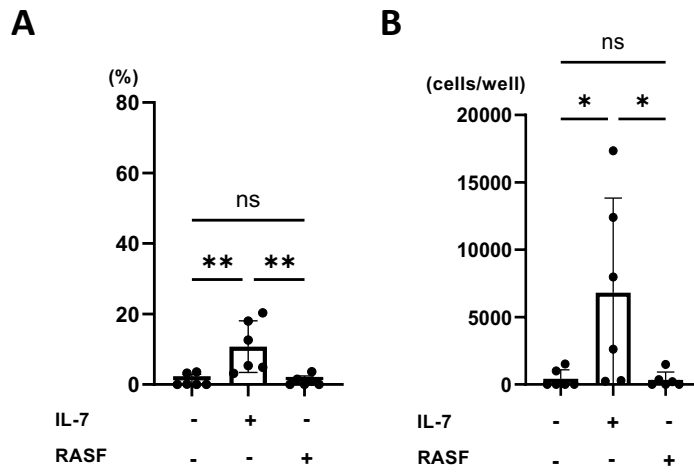

### Supplemental figure 1

Development of Tph-like cells after culture either with IL-7 or RASF. (A) The frequency (A) or number (B) of PD-1<sup>high</sup> CTV<sup>low</sup> Tph-like cells induced in culture conditions as indicated below is shown (n=6). \*p < 0.05, \*\*p < 0.01.
