# Supplementary material for: Homeostatic signals, including IL-7 and self-MHC recognition, induce the development of peripheral helper T cells, which are enriched in the joints of rheumatoid arthritis
Source: PubMed Central journal article supplement (PMC11567946; doi:10.1016/j.jtauto.2024.100258), 2024-10-30
Supplement: mmc3.pdf [file mmc3.pdf]

Supplemental table 1.

|                         | RA (SF, n=18) | RA (PBMC, n=6) | OA (n=3)                 |
|-------------------------|---------------|----------------|--------------------------|
| Age (years)             | 62 ± 8.2      | 65.5 ± 10.5    | 58 ± 7.8                 |
| Sex (female/male)       | 16/2          | 5/1            | 2/1                      |
| RF/ACPA positive (%)    | 100           | 100            | n.a.                     |
| RA duration (years)     | 9.5±8.3       | 14.5±9.6       | n.a.                     |
| CRP (mg/L)              | 11±13.7       | 1±7.6          | 0.4±0.3                  |
| Methotrexate (%)        | 75            | 0              | -                        |
| Biological DMARDs (%)   | 44            | 50             | -                        |
| Glucocorticoids (%)     | 38            | 33             | -                        |
| Kellgren-Lawrence grade | n.a.          | n.a.           | grade 4, 2<br>grade 3, 1 |

RA, rheumatoid arthritis; SF, synovial fluid; PBMC, peripheral blood mononuclear cells; OA, osteoarthritis; RF, rheumatoid factor; ACPA, anti-citrullinated protein/peptide antibody; CRP, C-reactive protein; DMARD, disease modified anti rheumatic drug.
