# Supplementary material for: Homeostatic signals, including IL-7 and self-MHC recognition, induce the development of peripheral helper T cells, which are enriched in the joints of rheumatoid arthritis
Source: PubMed Central journal article supplement (PMC11567946; doi:10.1016/j.jtauto.2024.100258), 2024-10-30
Supplement: mmc4.pdf [file mmc4.pdf]

supplemental table 2.

| Antibodies                                  | Source                   | Identifier   |
|---------------------------------------------|--------------------------|--------------|
| Alexa Fluor 488 anti-human CXCR5 (RF8B2)    | BD Bioscience            | 558112       |
| PE anti-human 45RA (HI100)                  | BioLegend                | 304107       |
| PE-Cy7 anti-human PD-1 (J105)               | Thermo Fisher Scientific | 25-2799-42   |
| APC anti-human CD4 (RPA-T4)                 | BioLegend                | 300514       |
| APC-H7 anti-human CD4 (RPA-T4)              | BD Bioscience            | 560251       |
| FITC anti-human HLA-DR (G46-6)              | BD Bioscience            | 560944       |
| PE anti-human CD69 (FN50)                   | Thermo Fisher Scientific | 12-0699-41   |
| Alexa Fluor 647 anti-human ICOS (C398.4A)   | BioLegend                | 313515       |
| FITC anti-human CCR6 (R6H1)                 | Thermo Fisher Scientific | 11-1969-41   |
| PE anti-human CXCR3 (1C6)                   | BD Bioscience            | 560928       |
| APC anti-human CXCR5 (J252D4)               | BioLegend                | 356907       |
| BV450 anti-human CD3 (UCHT1)                | BD Bioscience            | 560366       |
| BV510 anti-human 45RA (HI100)               | BioLegend                | 304142       |
| Alexa Fluor 488 anti-human IL4 (8D4-8)      | Thermo Fisher Scientific | 53-7049-41   |
| PE anti-human TNF $\alpha$ (MAb11)          | Thermo Fisher Scientific | 12-7349-71   |
| PerCP anti-human GM-CSF (BVD2-21C11)        | BioLegend                | 502311       |
| APC anti-human IL-2 (MQ1-17H12)             | BD Bioscience            | 561054       |
| Alexa Fluor 488 anti-human IL-17a (N49-653) | BD Bioscience            | 560489       |
| PE-Cy7 anti-human IL-21 (3A3-N2)            | Thermo Fisher Scientific | 12-7219-41   |
| PerCP anti-human INF- $\gamma$ (4S.B3)      | BioLegend                | 502525       |
| APC anti-human CXCL13 (5334)                | R&D Systems              | MAB202-SP    |
| FITC anti-human CD27 (M-T271)               | BD Bioscience            | 560986       |
| PE anti-human 45RO (UHL1)                   | Thermo Fisher Scientific | 12-0457-41   |
| APC anti-human CD19 (HIB19)                 | Thermo Fisher Scientific | 17-0199-42   |
| BV450 anti-human CD38 (HIT2)                | Tonbo Bioscience         | 75-0389-T025 |
| Biotin anti-human CXCR5 (MU5UBEE)           | Thermo Fisher Scientific | 13-9185-82   |
| Biotin anti-human PD-1 (J105)               | Thermo Fisher Scientific | 13-2799-80   |
| PE Streptavidin                             | BioLegend                | 405204       |
